# Supplementary material for: Facile crosslinking synthesis of hyperbranch-substrate nanonetwork magnetite nanocomposite for the fast and highly efficient removal of lead ions and anionic dyes from aqueous solutions
Source: Royal Society of Chemistry journal article supplement (doi:10.1039/c6ra11037a), 2016-01-01
Supplement: c6ra11037a1.pdf [file c6ra11037a1.pdf]

# Facile crosslinking synthesis of hyperbranch-substrate nanonetwork magnetite nanocomposite for the fast and highly efficient removal of lead ions and anionic dyes from aqueous solutions

Mingqiang Liu,<sup>ab</sup> Baochang Zhang,<sup>a</sup> Huicai Wang,<sup>\*ab</sup> Fei Zhao,<sup>a</sup> Yuan Chen,<sup>ab</sup> and Qiang Sun<sup>ab</sup>

<sup>a</sup> School of Environmental and Chemical Engineering, Tianjin Polytechnic University, Tianjin 300387, China

<sup>b</sup> State Key Laboratory of Separation Membranes and Membrane Processes, Tianjin Polytechnic University, Tianjin 300387, China

\* Corresponding author.

Tel.: +086 22 83955859.

Fax: +086 22 83955859.

E-mail address: [wanghuicai@tjpu.edu.cn](mailto:wanghuicai@tjpu.edu.cn).

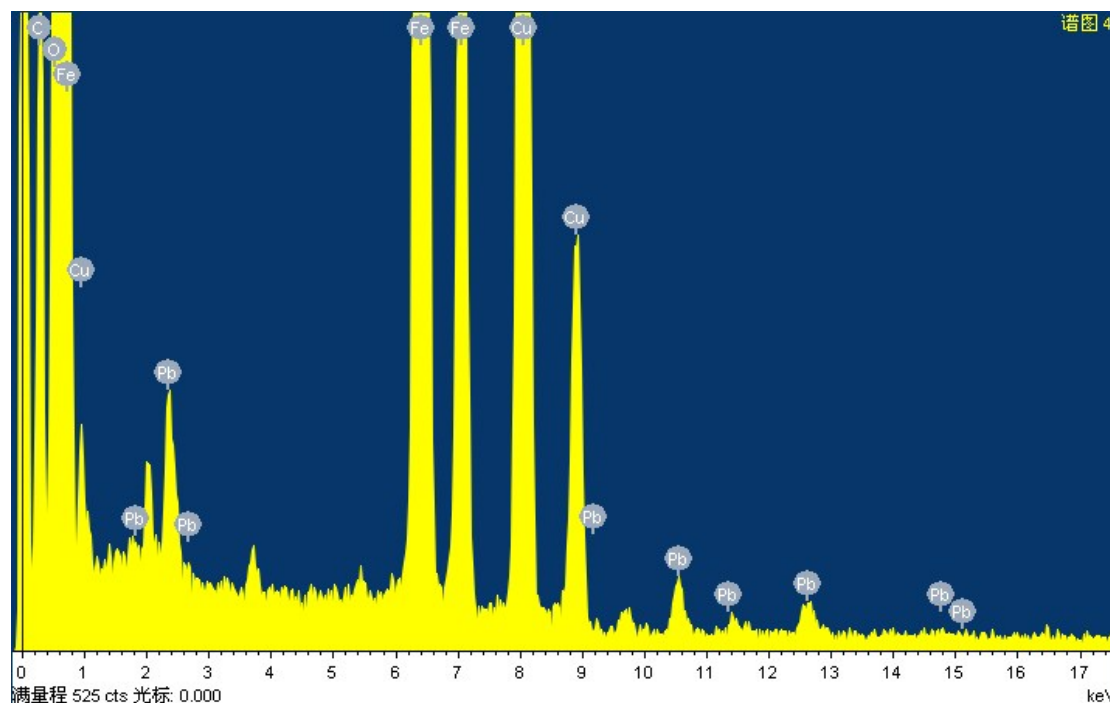

Figure. S1 EDS spectra of Fe<sub>3</sub>O<sub>4</sub>-HBPA after adsorption of Pb<sup>2+</sup>.

Table S1. BET Surface Areas, Pore Volumes, and Average Pore Size of Fe<sub>3</sub>O<sub>4</sub>-NH<sub>2</sub> and Fe<sub>3</sub>O<sub>4</sub>-HBPA.

| sample                                          | S <sub>BET</sub> <sup>a</sup> (m <sup>2</sup> ·g <sup>-1</sup> ) | V <sub>t</sub> <sup>b</sup> (cm <sup>3</sup> ·g <sup>-1</sup> ) | D <sub>p</sub> <sup>c</sup> (nm) |
|-------------------------------------------------|------------------------------------------------------------------|-----------------------------------------------------------------|----------------------------------|
| Fe <sub>3</sub> O <sub>4</sub> -NH <sub>2</sub> | 29.525                                                           | 0.046                                                           | 3.013                            |
| Fe <sub>3</sub> O <sub>4</sub> -HBPA            | 36.599                                                           | 0.055                                                           | 2.805                            |

a Specific surface area (BET).

b Total pore volume.

c Average pore size.

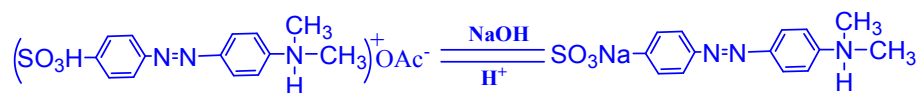

Figure. S2. Form mechanism of methyl orange in aqueous solution.
